# Supplementary material for: Transcriptional regulation of genes bearing intronic heterochromatin in the rice genome
Source: PubMed Central journal article supplement (PMC7145194; doi:10.1371/journal.pgen.1008637), 2020-03-18

**A**

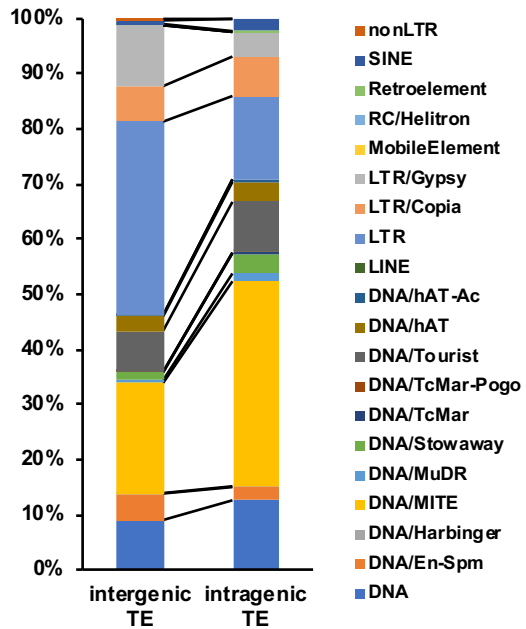

**B**

Orientation of intronic TEs against genes

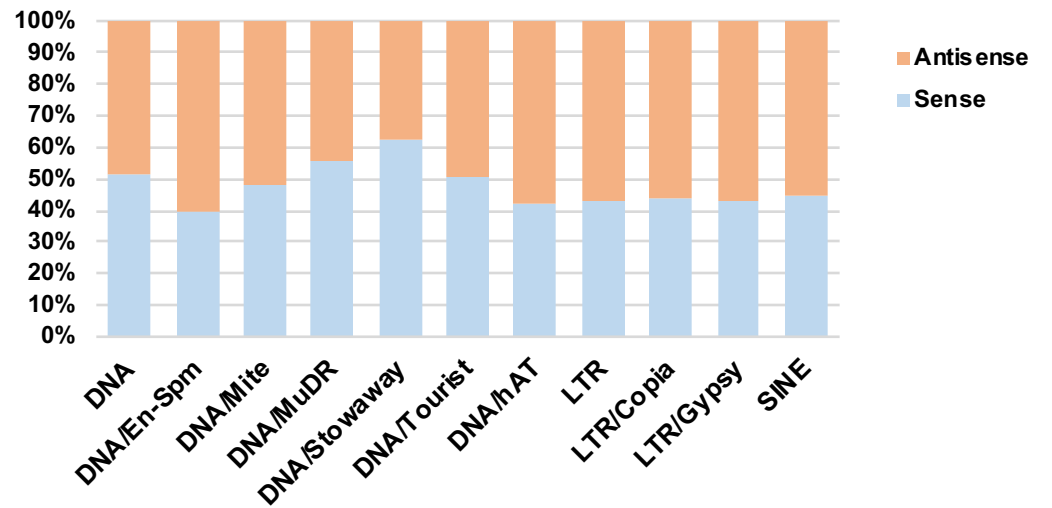

**C**

Heterochromatic intron with TE and repeat

Heterochromatic intron without repeat

Non-heterochromatic intron

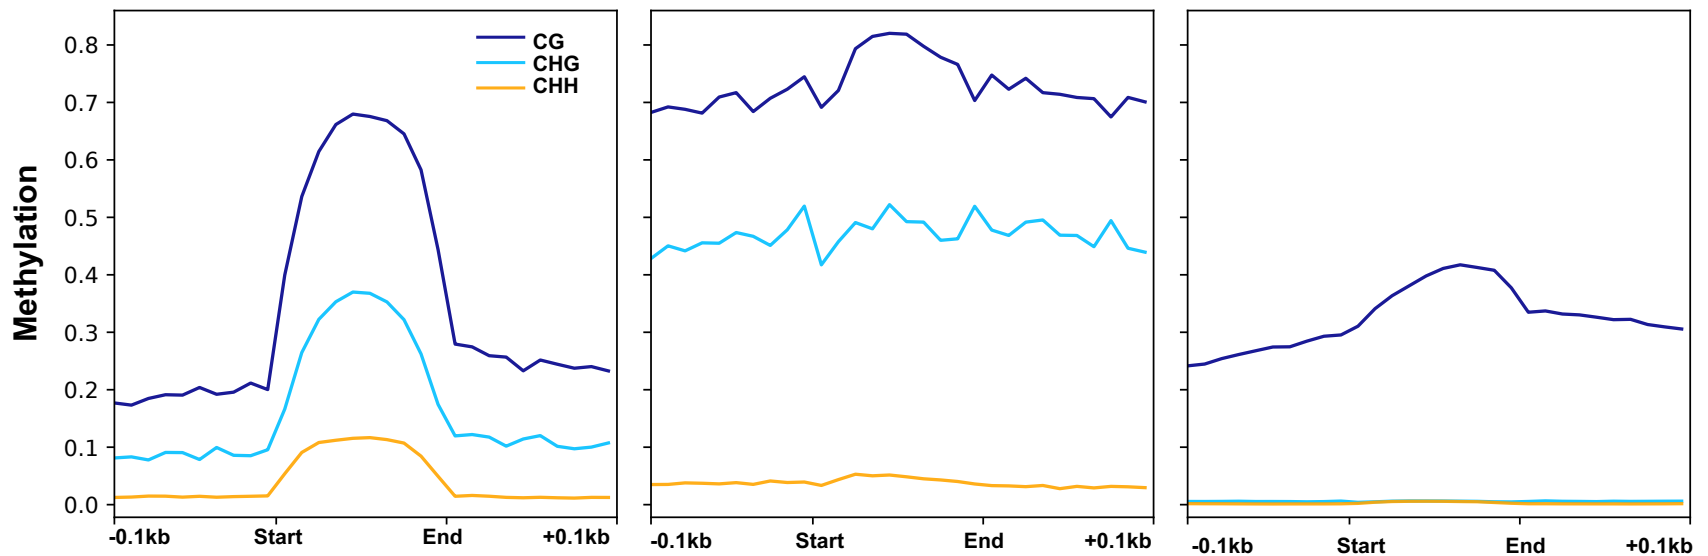

**D**

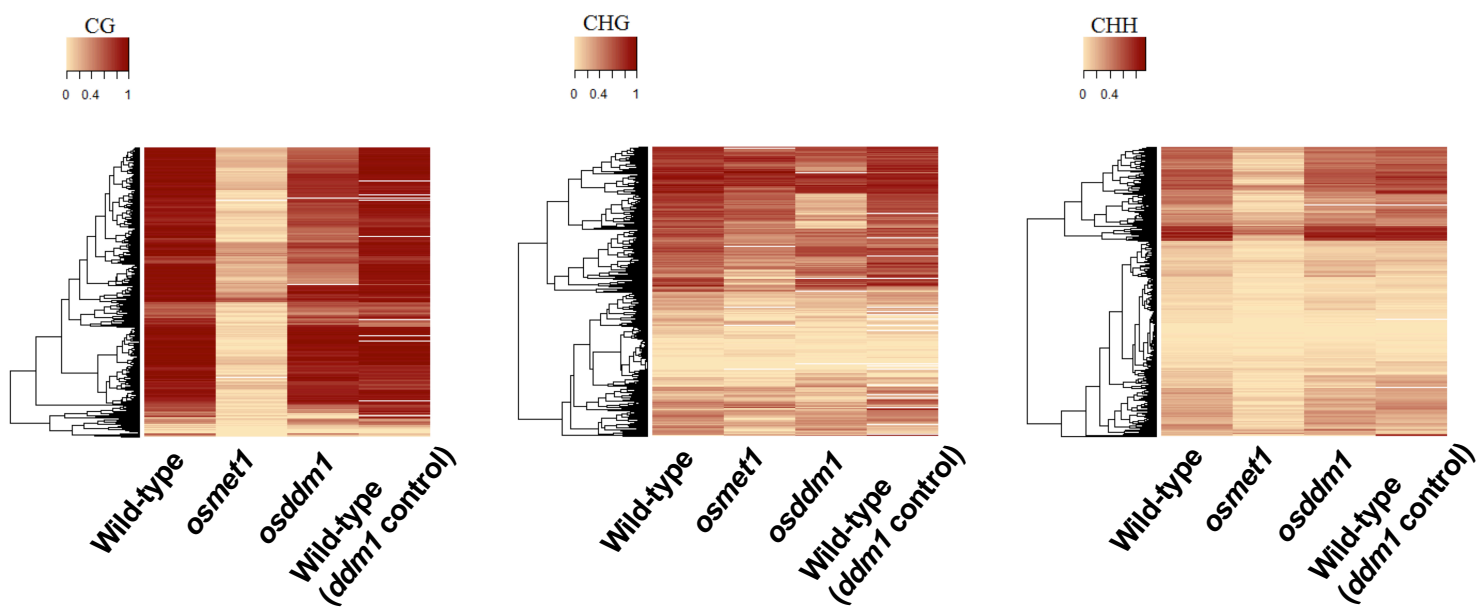

Supplement: pgen.1008637.s003.pdf [file pgen.1008637.s003.pdf]
