# Supplementary material for: Transcriptional regulation of genes bearing intronic heterochromatin in the rice genome
Source: PubMed Central journal article supplement (PMC7145194; doi:10.1371/journal.pgen.1008637), 2020-03-18

### A The number of encoded proteins

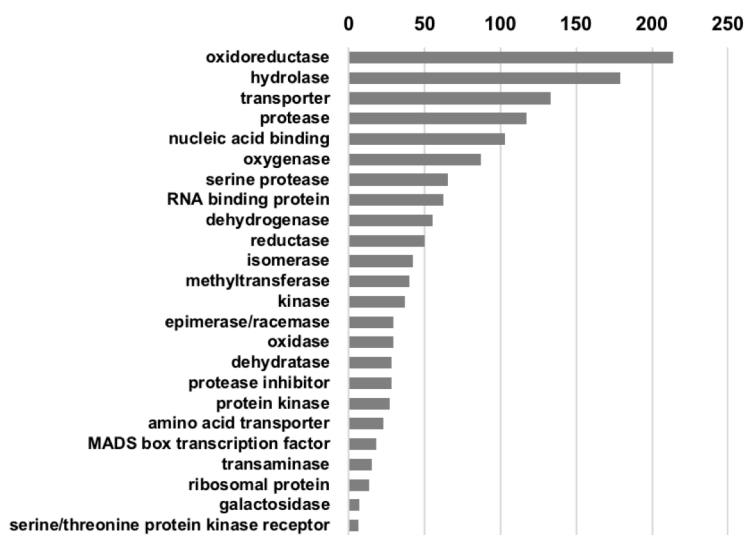

### B

### GO depletion

Adjusted  $p$ -value (-Log10)

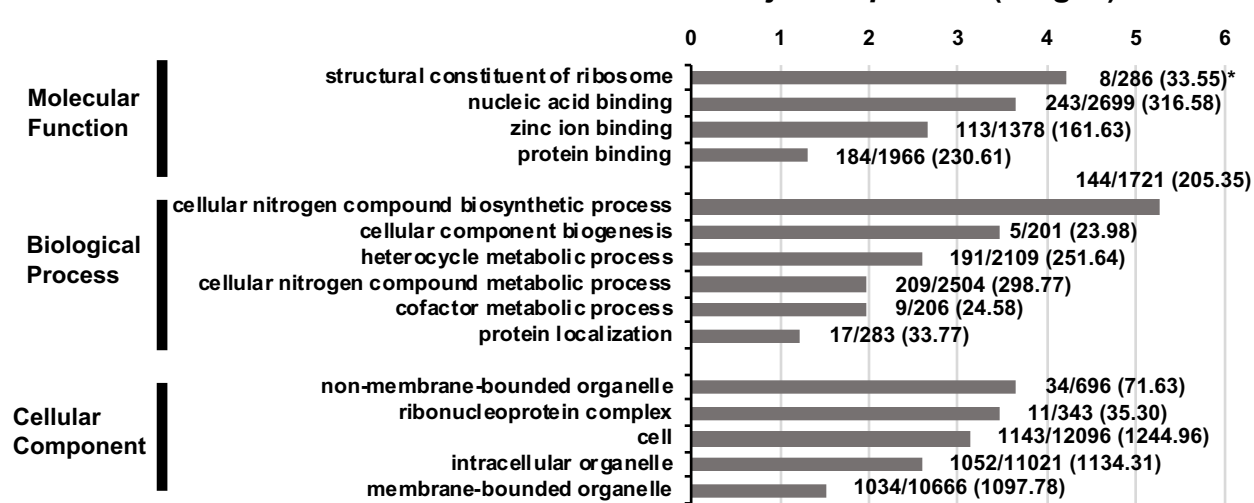

\*no. of genes in selection / no. of genes in background (expected)

### C

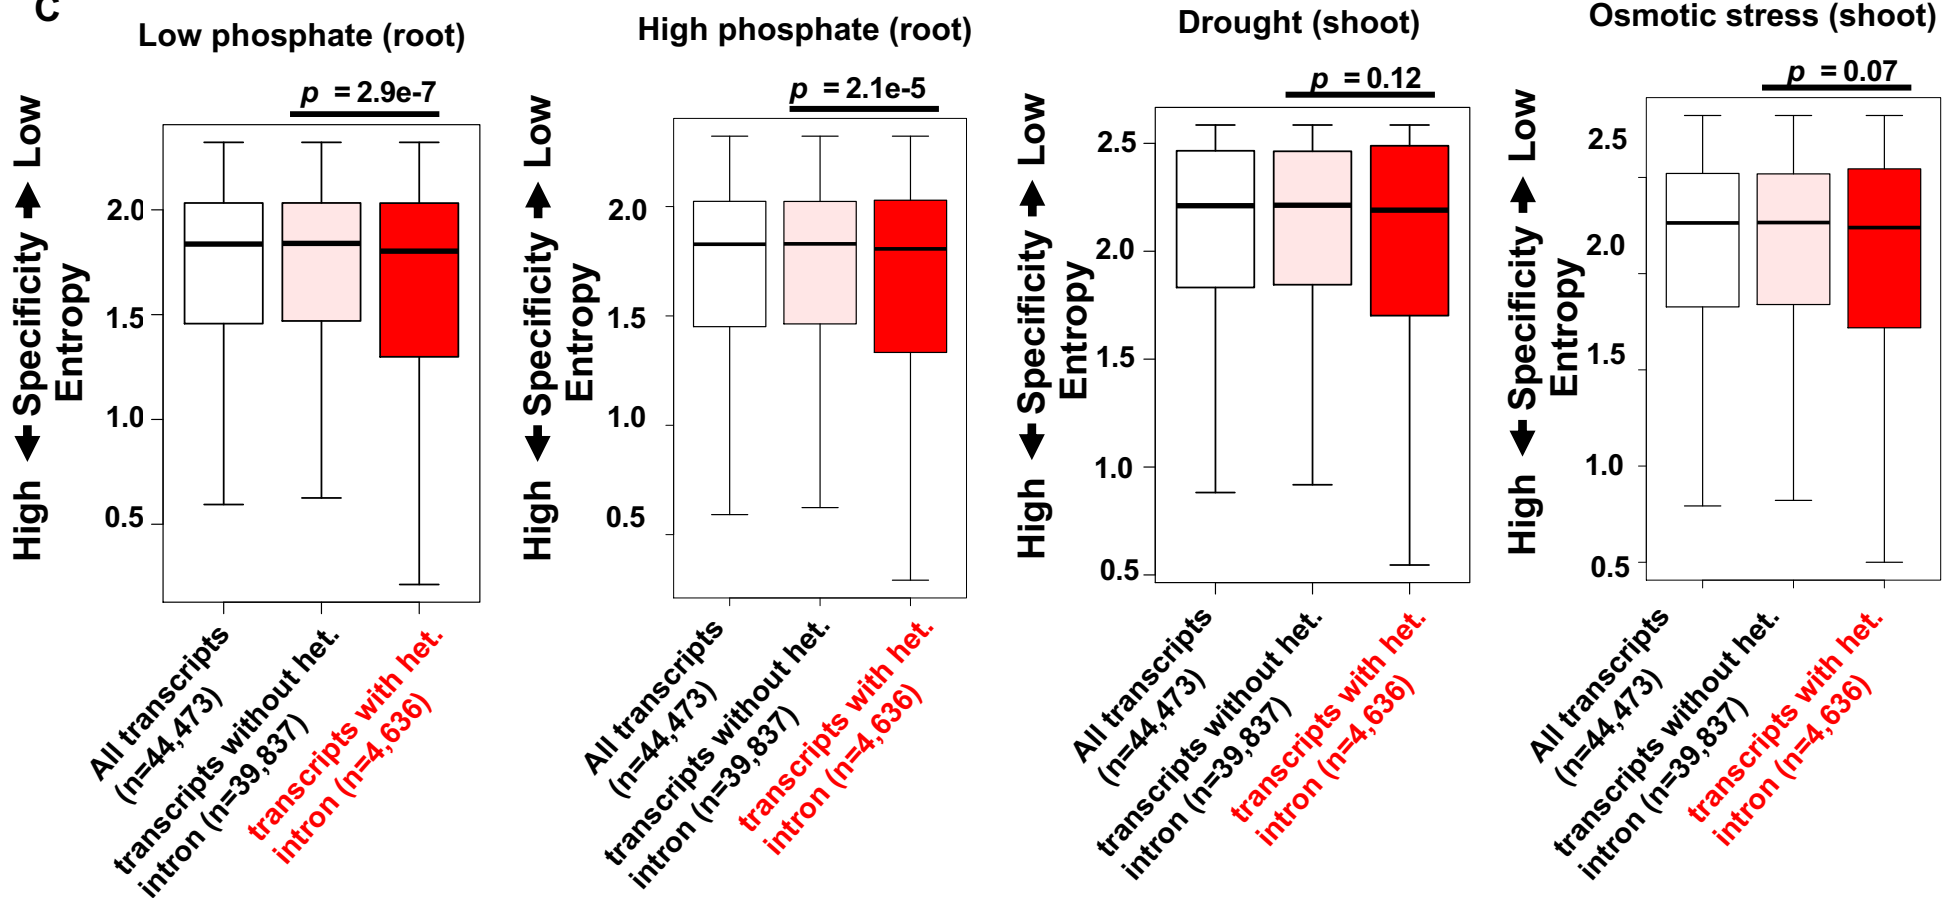

Supplement: pgen.1008637.s007.pdf [file pgen.1008637.s007.pdf]
