# Supplementary material for: Transcriptional regulation of genes bearing intronic heterochromatin in the rice genome
Source: PubMed Central journal article supplement (PMC7145194; doi:10.1371/journal.pgen.1008637), 2020-03-18
Supplement: pgen.1008637.s010.pdf [file pgen.1008637.s010.pdf]

# BAH domain

Pt\_0006s26040 1 ---MVEAKKVENIEFKWGRQGVGGKKKDVQFYESFSYDGVVEALYDSVVMYEEGE---TEPYIGKLLKIWENA--DKTKKVKVLWFFCP  
Pt\_0018s00870 1 ---MVEAEKVDCLIEFKWCKKRGVGGKKKDVQFYESFYDGDVYLYDSVVMYKEGE---PEPYIGKLIKIWENA--DKTKKVKVLWFFFRP  
Rc\_0803370 1 ---MIOAKEDENIEFKWGNKRGVGGKRDVQFYESFTFDGVEYMLYDSVVMYADIE---TEPYIGKIKIWENS--DKTKRVKILWFFFRP  
At\_IBM2 1 ---MEESVASEGLEFKWGGKRGVGGKKKDVQFYESFTFDGDEYRLYDCVLVGNASEPDSTEPFIGMIKIWEHANKHIPKKVKLLWFFFKP  
Zm\_GRMZM2G04486 1 -----MDGNAETIQFSWGKRRGKGGAKMDTQFYSFTLDNVKYSLEFDCVYLFKHGD---PEPYIGKIVKIWEKD---NDKKVKILWFFHP  
Sb\_05g001150 1 -----MDGNAEPIQFSWGKRRGAGGSKMDTQFYSFTLDNVKYSLEFDCVYLFKHGD---PVPYIGKIVKIWEQN---SAKRVKVLWFFFLP  
Os\_IBM2 1 -----MDGSNENIQFSWGKRRAGGKIKMDTQFYDSTFDNVKYSLEFDCVYLFKSGE---SEPYIGKIKIWQN---QAKKVKILWFFFLP  
AT3G15605 1 MLQSNSSAGGEDNPDFKWKAGKRGVGRKDNKVRFYESFTLEGTLYRLFDCAFYRFLG-----

Pt\_0006s26040 83 REISNYLG-DEKTAENELFLASGEGVGNANVPLEAIAAGKCNVVCSSKDSRNPOPSDEELOEADFVYRFTFDVGNCRILDKILDKIAGIE  
Pt\_0018s00870 83 REISNYLG-DEKTLKNELFLASGEGVGNANVPLEAIAAGKCNVVCSSKDSRNPLPSDEELOEADFVYRAFVDVGNCRILDMIDDKIAGIE  
Rc\_0803370 83 CEISNYLE-ANETSKNELFLASGDGVGLANVPLEAIAAGKCNVICSKDSRNPOPSNEELOMADFFRIFDVGRHVILDKIDDKIAQVD  
At\_IBM2 88 SEIAPYLEGVPNVLANEVFLASGEGGLANTNOLEAIAAGKCSVLCISKDKRNPOPSDEKFNADVFVCFRAFDVGSCKVVDITDDKIAGVD  
Zm\_GRMZM2G04486 80 DEVQNYLS--GPVMEKEIFLACGEGGLADINPLEAVAGKCTVICTSKDKRNROPSQOELQIADYIFYRVFDVKSLLTSDQLPKIAAFT  
Sb\_05g001150 80 DEIRNYLR--GPVMEKEIFLACGEGGLADINPLEAVAGKCTVICTSKDERNROPSQOELIADYIFYRFFDVGSLTHSDQLPKIATLT  
Os\_IBM2 80 DEIRKHL--GPVMEKEIFLACGEGVGLADINPLEAIAAGKCTVICISKDERNROPSPRELAMADYIFYRFFDVNSCTLSEQLPEKIAGVE  
AT3G15605 57 -----EYEPQWDELFLACGDEKGVSNINDVETIMGKCNVVCSSDDRNRNRPRTGKELRRAKYIFSRFTDTRLRITSEDFADAIAGIG

## gRNA1

Pt\_0006s26040 172 VKFLLNRVGNQSSSGVPKLDSKKKEVSGNFVAENDTRILTRTE-----SYLGEKATSSSHV  
Pt\_0018s00870 172 VKFLLNRVGNQNSSGVPKLDSNKKEVSGNAGVDDTRILAKKE-----SYLGEKAASSSGV  
Rc\_0803370 172 VKFLLNKVNSQKSHVPERDISIKKETSNAIVAADGTTLSSEMAMVERINLKTDDSSIDPLSKEDADSVLLPNORSVVGOKPASFSSD  
At\_IBM2 178 VKFIFNRACSEKEATAVQNIADVNGKSDSLKPNPARGASG-----SVRKIEDSAFESSDCKENSN  
Zm\_GRMZM2G04486 168 VDLLLNPKDELVIP---ANVLVNPVDEGMVAVPTPPSAVKLE-----DRSQAAALPLTQTG-  
Sb\_05g001150 168 VDVLLNPKDELVVSNPNTVPPNPVDEGLVAVPAVPSAVKTE-----DGSQAAALPLPQPAF  
Os\_IBM2 168 GNLLLNLSKVEQVTSQSDQEVHG---VDQKMLNVPVLPQSTVME-----DESPVAAVSLPSPV  
AT3G15605 138 VDKLFLNMRDRKQPVKRLNSSAAAITRASPVKSRPDLGSTKLGKHD-----NRDAKLMSRTSSLKKV

Pt\_0006s26040 228 KFNIEVTKINDRLVDNSGETASSSSKVKQISDIKPSLANQKCSPGENSASNLGLGEMTKVDEQEGIPSDIIASSSKDDVGVSESKVDKVF  
Pt\_0018s00870 228 QFDEVAKTNE-----  
Rc\_0803370 262 ELDEIAKIDHAQGDFFSGGKTIHSHKVDNSELITLDVKQKSSLGKPTSNIVGKLAGEATISDPHKDTASDKIRSRTEDEEIIADPKPLLV  
At\_IBM2 241 GKKEEKEKGHYQLAIKKSTLAEERSNKDSGSRGNHYNGKDQSEVKKQLTKQKSMGPEERYSNSFEASGSRTHSISKKAQENDVKKLT  
Zm\_GRMZM2G04486 223 QVDENLP-----ATVPL  
Sb\_05g001150 227 EVDENPP-----ATVPL  
Os\_IBM2 224 KE-ENVA-----SAIPF  
AT3G15605 200 TFLIEDR-----

Pt\_0006s26040 318 DOVLIEEKVKVAKDCGDLDD-----RPSKAKLDDLAKASYDNKVKGVQKVSHDSNGSN-----  
Pt\_0018s00870 238 ROVLVEEELKVAKASGDLDD-----RSCKAKLDDSAKASHDNKVKSTQKLRHDSNDSS-----  
Rc\_0803370 352 RORSSLGKHKASKELDRIDKNKKQESMSNDKIISRSIGDPIRPSKIDKLGSSSEASGNGKEKIVHKLIPDSKRCEGKASEVHAEVVKAL  
At\_IBM2 331 KOKSMPAGERYSQESSGLDD-----RPLKQKLDGSVTVRDGWDITLQNTSDGKKDTG  
Zm\_GRMZM2G04486 235 POSEVKEEQKVI-----AIPISQTVVKKEDKKSLSDIPLSHSAVKEDE-----  
Sb\_05g001150 239 SOSEVKEEQK-----QPVVRKEDKKSVAAIPLSHSAVKEDE-----  
Os\_IBM2 235 POPVVKEES-----AAAAIPPHVALKEES-----  
AT3G15605 206 -----ADHVHVKRN-----

Pt\_0006s26040 372 -----SKSVAQTPASEDKSKSNLTKDHHENNSGLSKRPKPDEKLTRLANGKFPEASLRQSEEGSKT-NC  
Pt\_0018s00870 292 -----SKAVAQTPAAEDKSRPNLTKDPOETNNALSSEKPKPDE---KLANGKFPEASLRQSEEGSKT-NY  
Rc\_0803370 442 EDSCRANRALKNDKLDGDFKHCDAKAVDRATTGTEISRKLKVDPNTEILSFKRKLDEKLTKFANGKLPRESPREVSNVDSNT-DS  
At\_IBM2 386 -----SFKRPRDKVTEIEVPPKRSFVKNRDLVVSVSEGKTTKTVTEKGISKKPSFGRAEDKMSADDNER-NY  
Zm\_GRMZM2G04486 279 -----TPVASIGPPQSAVMEINPKHTQLQDAHAGERPPKKLKLSQETTEQ-----DIDPTNTEQRPL-EL  
Sb\_05g001150 275 -----KPAASIAAPPQAVMDNIPKHTQLQDAHTGERPPKKLKLSQVTSQD---DMDPTTEQRPL-EL  
Os\_IBM2 260 -----VSKSTEN-----ITKPAQKVLPGERPPKRVKFSENVTVQNVPLDVPERPSRTGPL-EL  
AT3G15605 216 -----PVNTETLTRGQIPILKTRAFGELYASGSSVNAKPSKRRKLIILNTPETDSDDQGPQSGEKKLIKNP

## RRM

Pt\_0006s26040 437 HIOEVTTRRP-----EAPWEERMOTAHEOGLVLLQNLDPSTVSAEVEDIIWHAFKQSCVTKMIORTALASPHSGOAFVIFQKREVA  
Pt\_0018s00870 354 KIQEPTTRRP-----ATPWEETMOTAHEOGLVLLQNLDPSTVSAEVEDLIWQAFKQSCVTKMIORTARSSPHSGOAFVIFQKREVA  
Rc\_0803370 531 KILEVTRRPEADKIKWFKGLPWEERIKAAHAECHVLLQNLDPSTVGLVEDIVWHALKQSCVTKMIPCTAFSSPHSGOAFVIFKTREAA  
At\_IBM2 453 QVTEVCRRPDAGKSKWFRSLPWEESMREAEKGTVLLQNLDPSTVSEVEDIVYSALNQCEARMERTSVTIPHIGEALVIFKTREVA  
Zm\_GRMZM2G04486 338 QPKNIDRSK-----WFNIEWNDRILKMAADKGTLVYIQNLDIRFGPADIEELVRKALQLNCTAKPINHPTDYDDPNNGKAYAIKTKDAA  
Sb\_05g001150 334 PPKNIDRSK-----WFNIEWNDRILKMAADKGTLVYIQNLDIRFGPADIEELVRKALQLSCNAKPINHPTDYDDPNNGKAYAIKTKDAA  
Os\_IBM2 312 AGRQADRSK-----WFKIEWDTRLRNADQGLVYIQNLDIRFGPADIEELVRDALQNCIAKPINHPTDYDDPNNGKAYAIKTKSAA  
AT3G15605 282 PLVEKAPSONIEKKSWKLPFEDELKPAIEKGRVLLIENLEPSVTSLEVEFLFROAFKEGVDAMIPSSPMSSPHSGRALVIFGTTKAA

Pt\_0006s26040 518 EMAVAKLDEGCLMNSGRYGFTLFCHCIAAPCFPGKOSTFFGHLVINKLRIHKOR--EMKEAVSTSHCSQPNTLEYEMAMDWCLLQERSD  
Pt\_0018s00870 435 EMAVAKLDEVCMLNSGRP---LVGSIAPCFPGKOSTFFGHLTINKLRIHMOR--EMKEAVSTSHCSQPNTLEYDMAMEWCLLQDRSD  
Rc\_0803370 621 ETAVTKLDEGCLMNTSYGRP---LVGSIAPCFPGKOSTFFGHMSIDKTRHQMOR--VMREAVSTSHCSQPNTIEYDMALWCFLLQEQTN  
At\_IBM2 543 ERVIRRLDEGCLLSSGRP---LVASFATTPGKPSLFSGHIKLHKOTR--R--EMRDAVATSHSSQPNNLEFDMAEWCLHQARHE  
Zm\_GRMZM2G04486 421 DAAISKINSGLVVG--GRP---LYCSKGLLEVPKPSANLVGHLSS-YVKIGQKQRDEQKKA VATSHCSQPNTIEYDLALDWMLLREKQD  
Sb\_05g001150 417 DAAISKINSGLVVG--GRP---LYCSKGLLEVPKPPKLVGHLSS-HVKIGHKQRDEQSKAVATSHCSQPNTIEYDLALDWMLLREKQD  
Os\_IBM2 395 DSAISKINSGLVVG--GRP---LYCSKGLLVKVPKPSLGLHLTINNIRMGIRQREQKKA VATSHCSQPNTMEYDLALDWMLVRAKQE  
AT3G15605 372 DSAMSRINEDCLMNSGQRA---LTGSKNVPEIGRCRSETGHFNMVDR-----SLMTAQKVSICCITLRLFSVVIILVMVTHRKPNS

## gRNA2

Pt\_0006s26040 606 LALRKLROOQROELRKLWVTLKCK-----  
Pt\_0018s00870 519 LALRKLROOQEQELRKLRLATLKS-----  
Rc\_0803370 705 QEWELLYKQHGKELRKLLESTLTRQAS-----  
At\_IBM2 625 QASESVSKRQLEEMKSLRINFKLLPYETQEFWFHAIQSPNFDSEYTDAAAGLKSDDPFVVTYFFVRVSFTSEVLNFCVDQERSRE  
Zm\_GRMZM2G04486 504 QSFRLVHKKHREARKGFASLVGKSKAE-----  
Sb\_05g001150 500 QSFRLVHKKHREARKVFASLGKSLKAE-----  
Os\_IBM2 479 TKFRTLHKKHREARKTFASKMGK-----  
AT3G15605 450 PCQITEYYKLTPLFSLIIVNRPHKVFVNFQPH-----
