# Supplementary material for: Transcriptional regulation of genes bearing intronic heterochromatin in the rice genome
Source: PubMed Central journal article supplement (PMC7145194; doi:10.1371/journal.pgen.1008637), 2020-03-18
Supplement: pgen.1008637.s011.pdf [file pgen.1008637.s011.pdf]

A

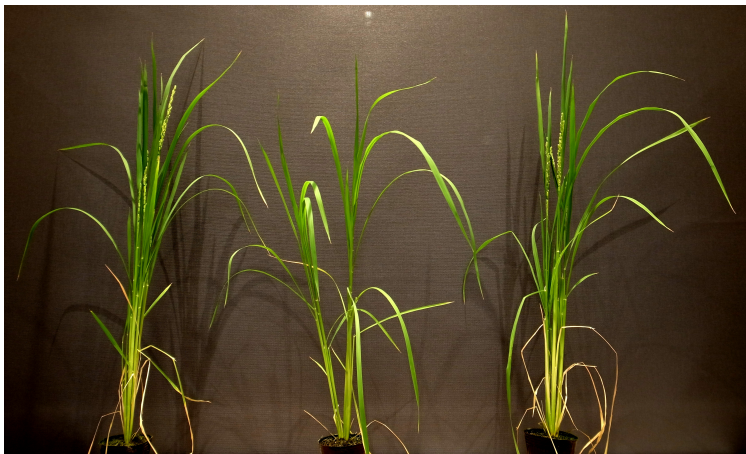

WT (Nipponbare) *RNAi-OsIBM2* #2 (T1) *RNAi-GFP*

B

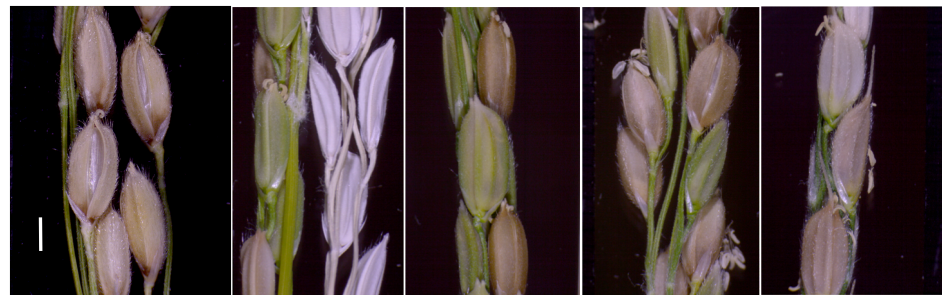

WT  
(Nipponbare)

#1

#12

#2

#16

*RNAi-OsIBM2* (T1)

C

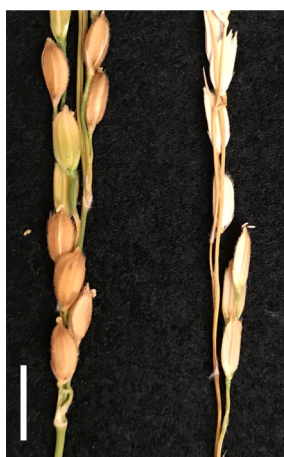

WT *osibm2\_g2* #24 (T4)

D

### Endosperm + Embryo

Nipponbare

*osibm2\_g2* #24

*Os02g0214500*  
(*THERMOSENSITIVE MALE STERILITY 5*)

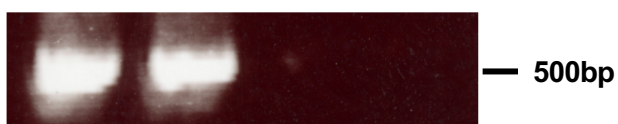

— 500bp

*Os02g0274000*  
(*RESTORATION OF FERTILITY 2*)

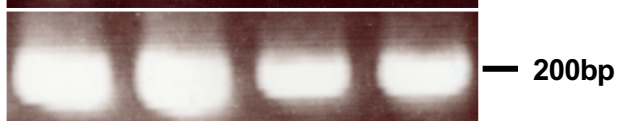

— 200bp

*Os03g0407400*  
(*LONG KERNEL 3*)

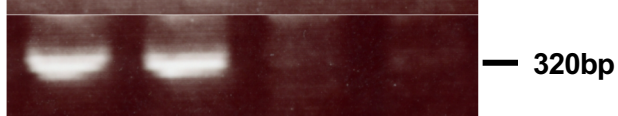

— 320bp

*Os05g0405000*  
(*FLOURY ENDOSPERM 4*)

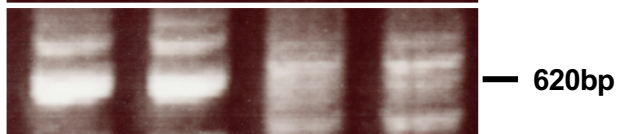

— 620bp

*Os06g0133000*  
(*WAXY*)

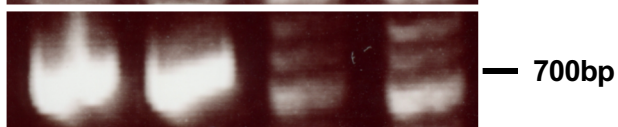

— 700bp

*Os07g0182000*  
(*RISBZ1/Grain filling*)

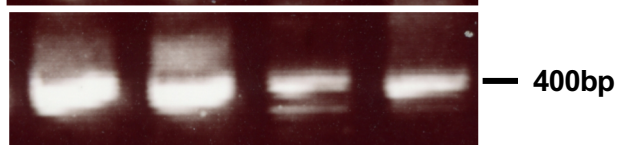

— 400bp

*UBQ*

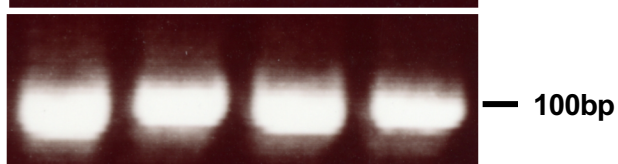

— 100bp
