# Supplementary material for: Transcriptional regulation of genes bearing intronic heterochromatin in the rice genome
Source: PubMed Central journal article supplement (PMC7145194; doi:10.1371/journal.pgen.1008637), 2020-03-18

A

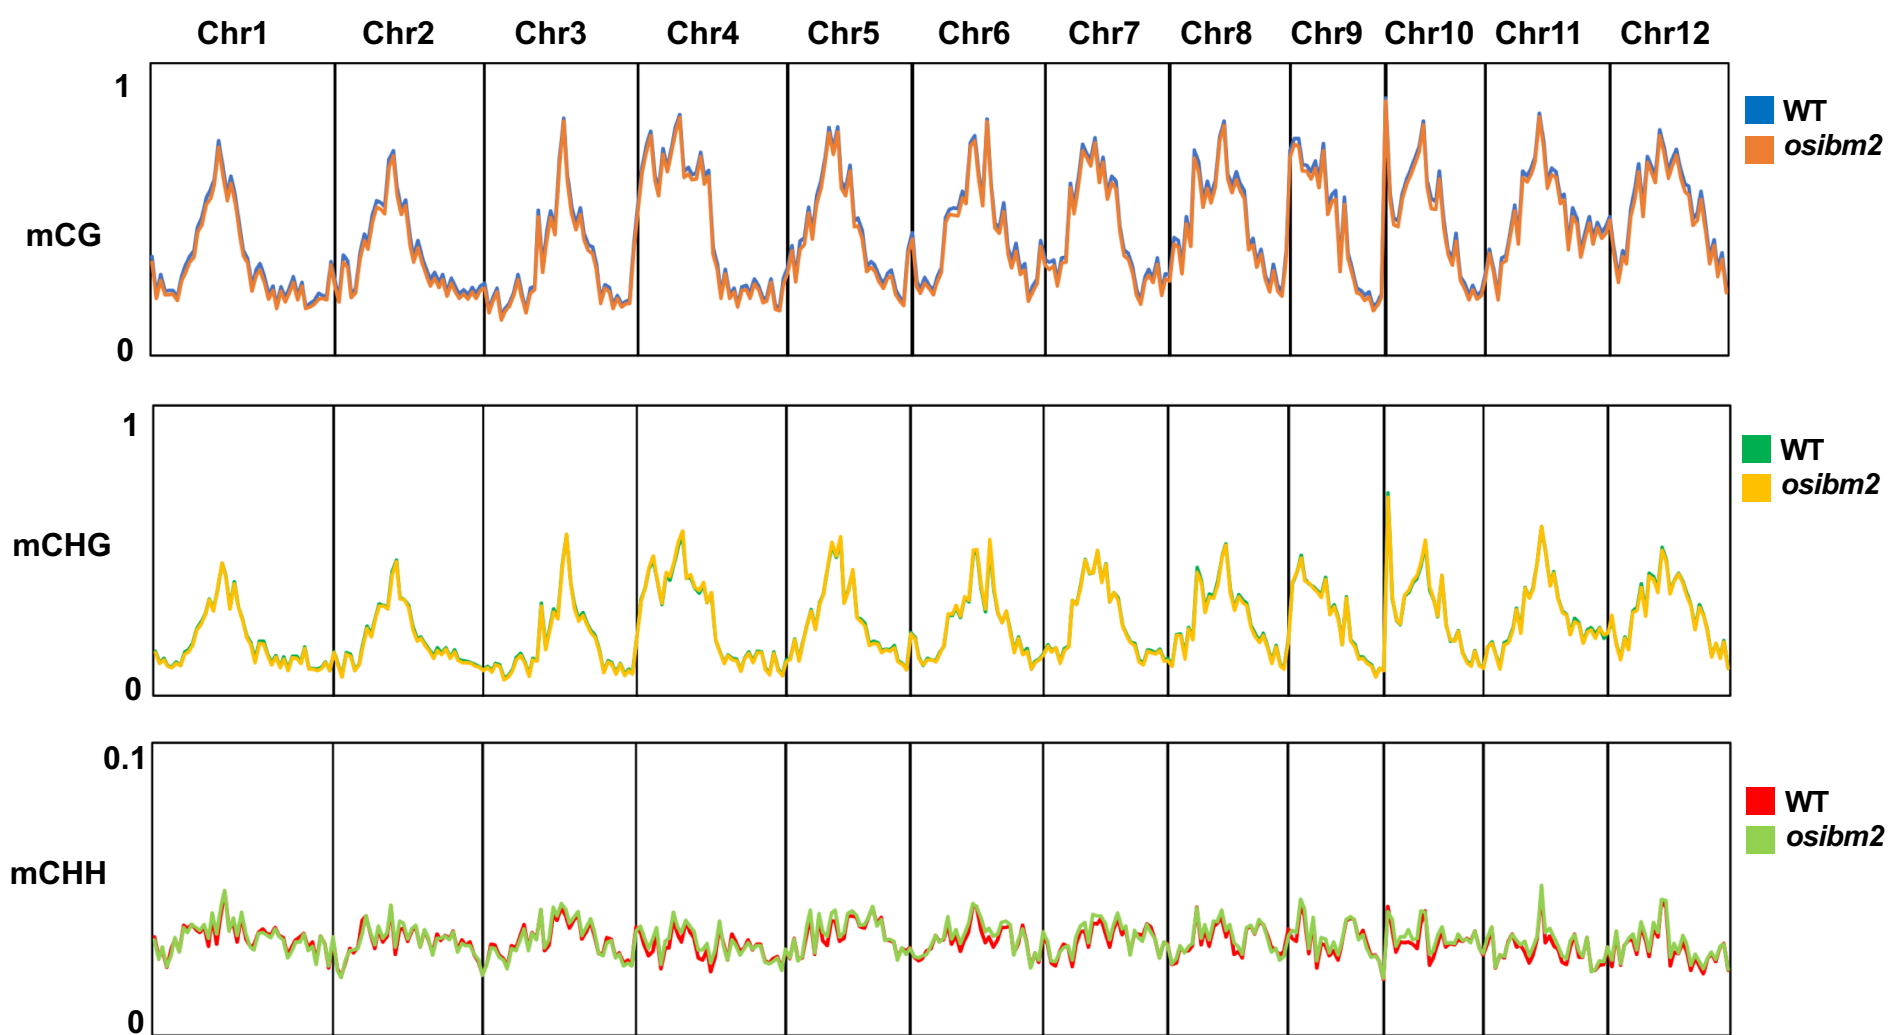

B

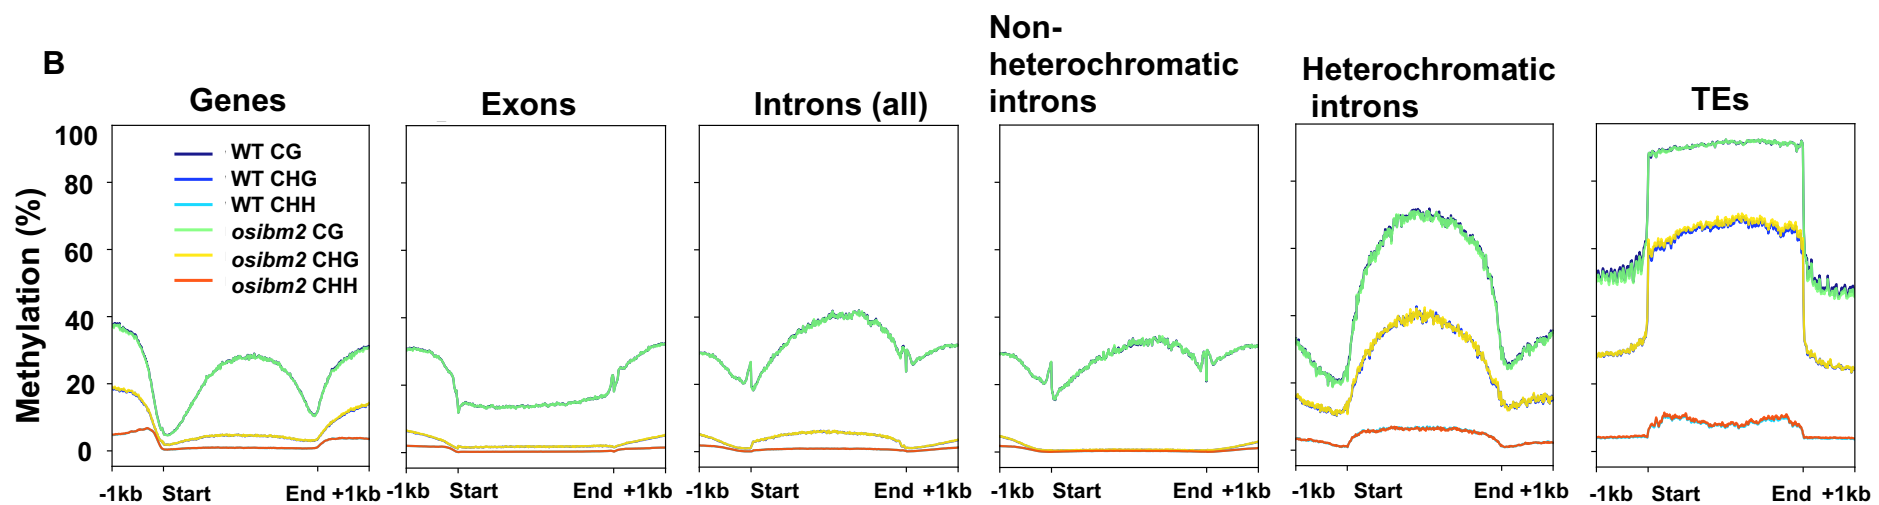

Supplement: pgen.1008637.s015.pdf [file pgen.1008637.s015.pdf]
