# Supplementary material for: Transcriptional regulation of genes bearing intronic heterochromatin in the rice genome
Source: PLoS Genet. 2020 Mar 18;16(3):e1008637. doi: 10.1371/journal.pgen.1008637 (PMC7145194; doi:10.1371/journal.pgen.1008637)
Supplement: S5 Table — (XLSX) [file pgen.1008637.s021.xlsx]

## Sheet: Table S4 primers
S5 Table: primers used in the study.
Primer Name	primers (5'-3')		Purpose	Comment
Os03g0225900 RT F1	CACTCAACCAGCTCCGTCCTAC		qRT-PCR	Fig S8
Os03g0225900 RT R1	CATGACTAGGGCAGATTGATCC		qRT-PCR	Fig S8
Os01g0714800 P1	GGTGGAGAGAGACAAGAACGAC		qRT-PCR	Fig S8
Os01g0714800 P2	TTAAGGTCTGGGTGACTGATCC		qRT-PCR	Fig S8
Os01g0714800 g1	GTCGAGCACCGGTAGTAGTTCC		Genotyping	Fig S9
Os01g0714800 g2	CGTTAAGAACAGCCCTAATCCG		Genotyping	Fig S9
Os02g0568700 P1	GTGGCGAACCTGACCTATTTG		qRT-PCR	Fig S8
Os02g0568700 P2	TCATGCACTTCCACAGCACTC		qRT-PCR	Fig S8
Os02g0568700 g1	ATTGAGTGGCTCATGCACTTCC		Genotyping	Fig S9
Os02g0568700 g2	GTTAGGAGCGGCGAGTGCTGTG		Genotyping	Fig S9
Os03g0610800 P1	CCAGTAACCGTGGACTTCGTTG		qRT-PCR	Fig S8
Os03g0610800 P2	GCAACACCCATTCTTGTCTTCC		qRT-PCR	Fig S8
Os03g0610800 g1	GAGACCCACTCGGTCGACTTCC		Genotyping	Fig S9
Os03g0610800 g2	TCACCTGACTAGCAACTTCAGC		Genotyping	Fig S9
Os05g0268500 P1	ACAAGGGCTTGAGCTTGGTAAC		qRT-PCR	Fig S8
Os05g0268500 P2	TTGTACTTTTGTAGGCGCATCG		qRT-PCR	Fig S8
Os05g0268500 g1	GAGTATCTGGTTGCTGTCAAGG		Genotyping	Fig S9
Os05g0268500 g2	TGCAGCTGGCCTAAGAATATGG		Genotyping	Fig S9
Os02g0291600 P1	TTCCCCTACTTCAACCAACCAC		qRT-PCR	Fig S8
Os02g0291600 P2	AACTTTGCGGTGCCATTGTAG		qRT-PCR	Fig S8
Os02g0291600 g1	CCACCTTCGCCAACCCATCGGC		Genotyping	Fig S9
Os02g0291600 g2	GAGCTGTCGATGTTCACAAACC		Genotyping	Fig S9
Os04g0453200 P1	ACGCCATCTTCCTCTTCTACGC		qRT-PCR	Fig S8
Os04g0453200 P2	TACCAGTGCTTCGCCCACAC		qRT-PCR	Fig S8
Os04g0453200 g1	GAGTATCTGGTTGCTGTCAAGG		Genotyping	Fig S9
Os04g0453200 g2	GGAACGATTGCATCTGCGTCAC		Genotyping	Fig S9
Os04g0597866 P1	CTTCTCTGGCTCTCCCTGTTTC		qRT-PCR	Fig S8
Os04g0597866 P2	CTCCAGCTCCTTCCACAAGTTC		qRT-PCR	Fig S8
Os04g0597866 g1	GGAGCAGCTGACTAAGCACAAG		Genotyping	Fig S9
Os04g0597866 g2	TTCTCGTCCAACCTGCCCAAGG		Genotyping	Fig S9
Os05g0420750 P1	TTTGCCGAATGTACTGCTTCAC		qRT-PCR	Fig S8
Os05g0420750 P2	AGGTTTATGTGGGATGGGGTTC		qRT-PCR	Fig S8
Os05g0420750 g1	CAGTTTATTGTGCATTCCCTTG		Genotyping	Fig S9
Os05g0420750 g2	TCAACAGATGAACTTACACTGC		Genotyping	Fig S9
Os06g0681600 P1	CACCTTCGACCTGGGCTACTAC		qRT-PCR	Fig S8
Os06g0681600 P2	CGAACACCTGGAAGAACACCTC		qRT-PCR	Fig S8
Os06g0681600 g1	CCGACCTCATCTGGTTGTCAGG		Genotyping	Fig S9
Os06g0681600 g2	GCGCGATGCCGATCGTGTGCGC		Genotyping	Fig S9
Os11g0229300 P1	GTCTTGAAGCTCATGCCAAATG		qRT-PCR	Fig S8
Os11g0229300 P2	GATGCAGATTGAGAAGCCAGAG		qRT-PCR	Fig S8
Os11g0229300 g1	GAAATTGCTGACGAAATTGTCC		Genotyping	Fig S9
Os11g0229300 g2	GGTAGCTCAGATTTAGGATCGC		Genotyping	Fig S9
Os11g0668300 P1	CGCGTGATGATTTACTGTTTGG		qRT-PCR	Fig S8
Os11g0668300 P2	CTGCTCGATAACCTTCATTTGG		qRT-PCR	Fig S8
Os11g0668300 g1	CATTCGTCGAGTGGTGAGCTGC		Genotyping	Fig S9
Os11g0668300 g2	TATTCTCTTTGCGTACCTTAAC		Genotyping	Fig S9
OsIBM2 gRNA 1	AATGTTTTCGAATCTCATCC		guide RNA for CRISPR-Cas9	Fig 6
OsIBM2 gRNA 1 F1	GCAAAAGGTGGTATTAAGATGGATACACAG		confirmation of deletion by CRISPR-Cas9	Fig 6
OsIBM2 gRNA 1 R1	ACATAATAGTGATTATCTGTCCATTGAGTG		confirmation of deletion by CRISPR-Cas9	Fig 6
OsIBM2 gRNA 2	TCGGACAAGCATCCAATCCA		guide RNA for CRISPR-Cas9	Fig 6
OsIBM2 gRNA 2 F1	AAGAACAGGTGCTGATGTTGTCCTATGAAG		confirmation of deletion by CRISPR-Cas9	Fig 6
OsIBM2 gRNA 2 R1	ATAAGCACGGAACAGGACAGTTCCCATCGC		confirmation of deletion by CRISPR-Cas9	Fig 6
ACT1 F	TCCATCTTGGCATCTCTCAG		qRT-PCR	Fig 6
ACT1 R	TGGCTTAGCATTCTTGGGTC		qRT-PCR	Fig 6
OsIBM2 F	TGAAAGACCAAGTCGCACTG		qRT-PCR	Fig 6
OsIBM2 R	ACAAGTGTCCCCTGCTCATC		qRT-PCR	Fig 6
gus linker F	TGCTGTCGGCTTTAACCTCT		Genotyping
gus linker R	TTTTTGTCACGCGCTATCAG		Genotyping
GFP F	GAAGTTCATCTGCACCACCGGC		Genotyping
GFP R	CTTCGGGCATGGCGGACTTG		Genotyping
OsI2 3p Fwd 1	CACCGGTCGGTGGAAGACCCC		Genotyping
OsI2 3p Rev 1	ATGAGCAGAGTCAGTGTGGTG		Genotyping
UBQ F	GATCAAGAACTAGAGCGTCACTCG		qRT-PCR	Fig 5, S8, S11, S13
UBQ R	ACAAGAAGCTGAAGCATCCAGCAC		qRT-PCR	Fig 5, S8, S11, S13
OS01G0650200 RT F1	TGGGGTTCATACACACAACCTC		qRT-PCR	Fig S13
OS01G0650200 RT R1	ACCAGCTTATTTCGACGATTCC		qRT-PCR	Fig S13
OS03G0332100 RT F1	TACATCCCTGTTTCCACAATGC		qRT-PCR	Fig S13
OS03G0332100 RT R1	TTGAGTTCAGCCATAGCAAAGC		qRT-PCR	Fig S13
OS06G0360600 RT F1	TGAACAACCCGGCGAATTATAC		qRT-PCR	Fig S13
OS06G0360600 RT R1	ATGCAAAGGATTGCTTTCTGG		qRT-PCR	Fig S13
OS08G0567200 RT F1	TACTGCAAAGGTTGTGGACCAG		qRT-PCR	Fig S13
OS08G0567200 RT R1	AAGCAAACCATCCATTCTAGGG		qRT-PCR	Fig S13
OS01G0650200 F2	CTGCTCGGCCTGCTCTGCCCAG		3′ RACE	Fig 5
OS01G0650200 F3	CAAGACCCGCAAGACCTTGAGC		3′ RACE	Fig 5
OS03G0332100 F1	AGGCGCGACGCCGACGGCGAGC		3′ RACE	Fig S14
OS03G0332100 F2	GCTGCCCTTCTACGAGAAGTGG		3′ RACE	Fig S14
OS06G0360600 F1	AGAAGAGACCACAATATGAGGC		3′ RACE	Fig S14
OS06G0360600 F2	CATTACTGTATATGGTATGCTC		3′ RACE	Fig S14
OS08G0567200 F1	ATCCAGAAGAAACCTAAAATGC		3′ RACE	Fig S14
OS08G0567200 F2	TCACAAGTAAAGCTATATTAGC		3′ RACE	Fig S14
oligodT T7 2-3	CAGTGAATTGTAATACGACTCACTATAGGNVTTTTTTTTTTTTTTT		3′ RACE	Fig S14
T7-3 primer	CAGTGAATTGTAATACGACTC		3′ RACE	Fig S14
T7-2 primer	TTGTAATACGACTCACTATAGG		3′ RACE	Fig S14
Os02g0214500 F1	CATCACCGATATCGACGTTTAC		RT-PCR	Fig S11
Os02g0214500 R1	CATTAGGATACTCCATTGCTGG		RT-PCR	Fig S11
Os02g0274000 F1	CATGTCAACACTTGTCACGTGC		RT-PCR	Fig S11
Os02g0274000 R1	GCAGTTGAAGATTTCCGCTGAG		RT-PCR	Fig S11
Os03g0407400 F1	CCACGCTGCCTCCAGATGCTGC		RT-PCR	Fig S11
Os03g0407400 R1	GCGGCGGCAGCGACACGGACTC		RT-PCR	Fig S11
Os05g0405000 F1	AGAGCGCGGCACGGCAAGCCGG		RT-PCR	Fig S11
Os05g0405000 R1	AGTGGCAGTCAGGTCAGTGTCG		RT-PCR	Fig S11
Os06g0133000 F1	CATCACCGGCATCGTCAACGGC		RT-PCR	Fig S11
Os06g0133000 R1	GCCCAGGAGCACATTCTCCCAG		RT-PCR	Fig S11
Os07g0182000 F1	CGTGGAGTACAACGCGATGCTG		RT-PCR	Fig S11
Os07g0182000 R1	CGAGCTGCCTTTCTGCTTCTTG		RT-PCR	Fig S11
